# Supplementary material for: Coordinated Regulation of Central Carbon Metabolism in Pyroligneous Acid-Treated Tomato Plants under Aluminum Stress
Source: MDPI journal article supplement (doi:10.3390/metabo13060770), 2023-06-20
Supplement: s1 [file s1]

**Figure S1.** Chromatograms for all identified metabolites of CCM routes. The sections (1-3) show detection of CCM metabolites. The compound names and the ion transition of each compound are shown on the extracted ion chromatograms (XICs)

## 1. TCA cycle

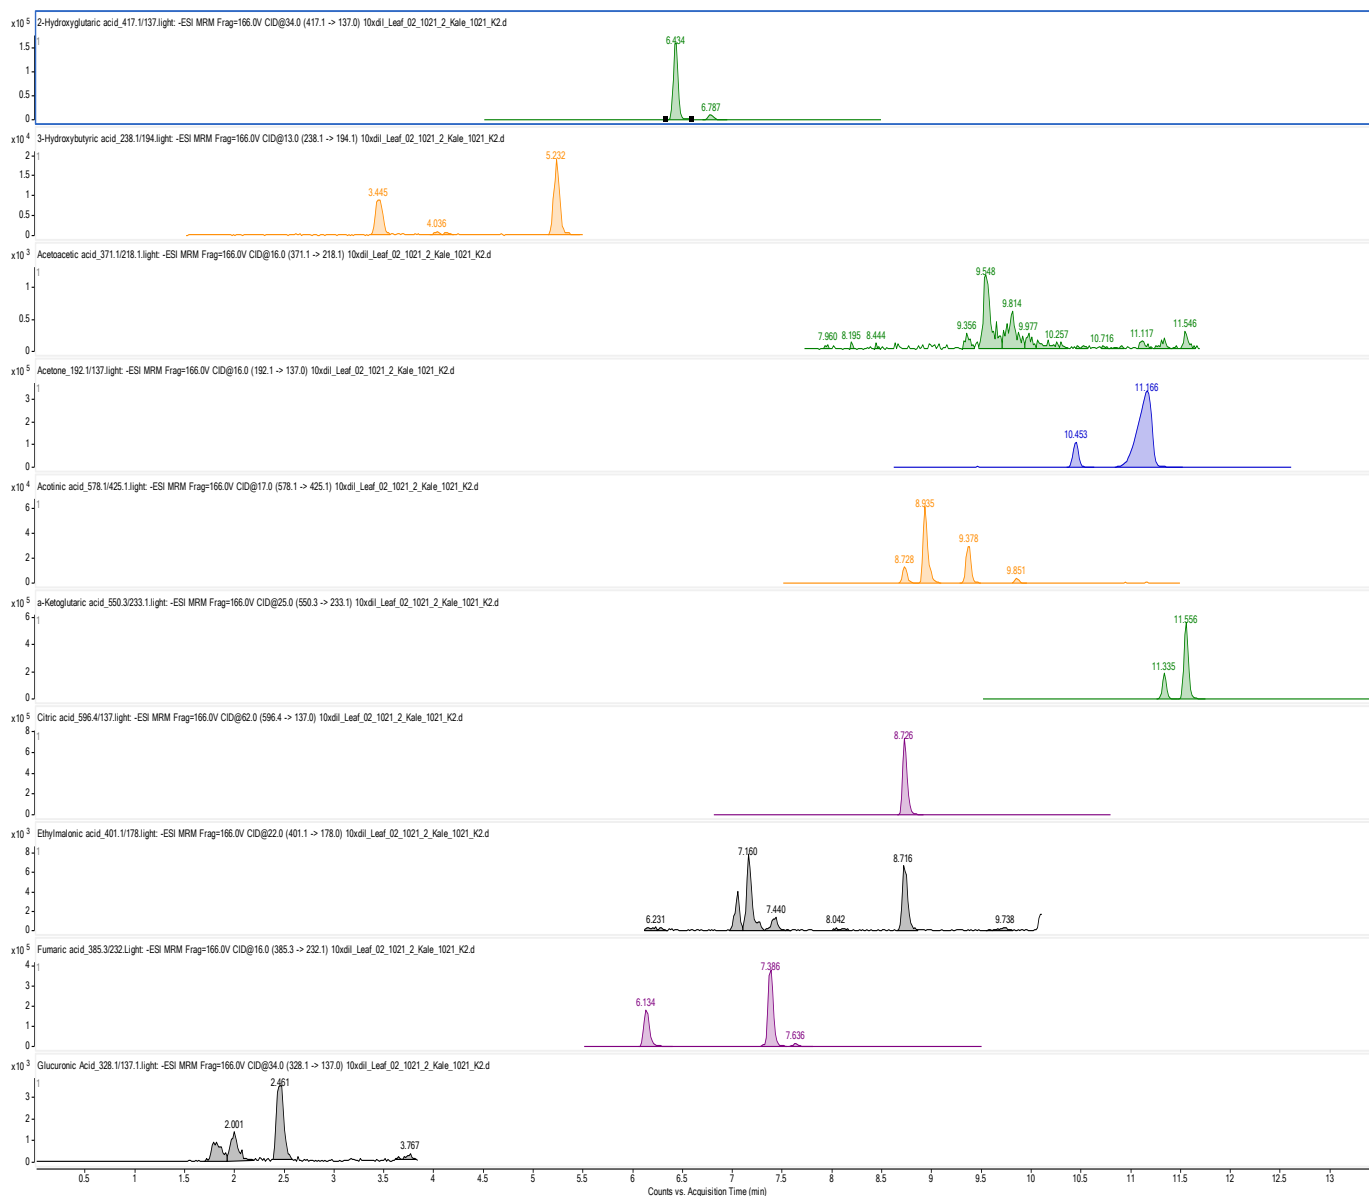

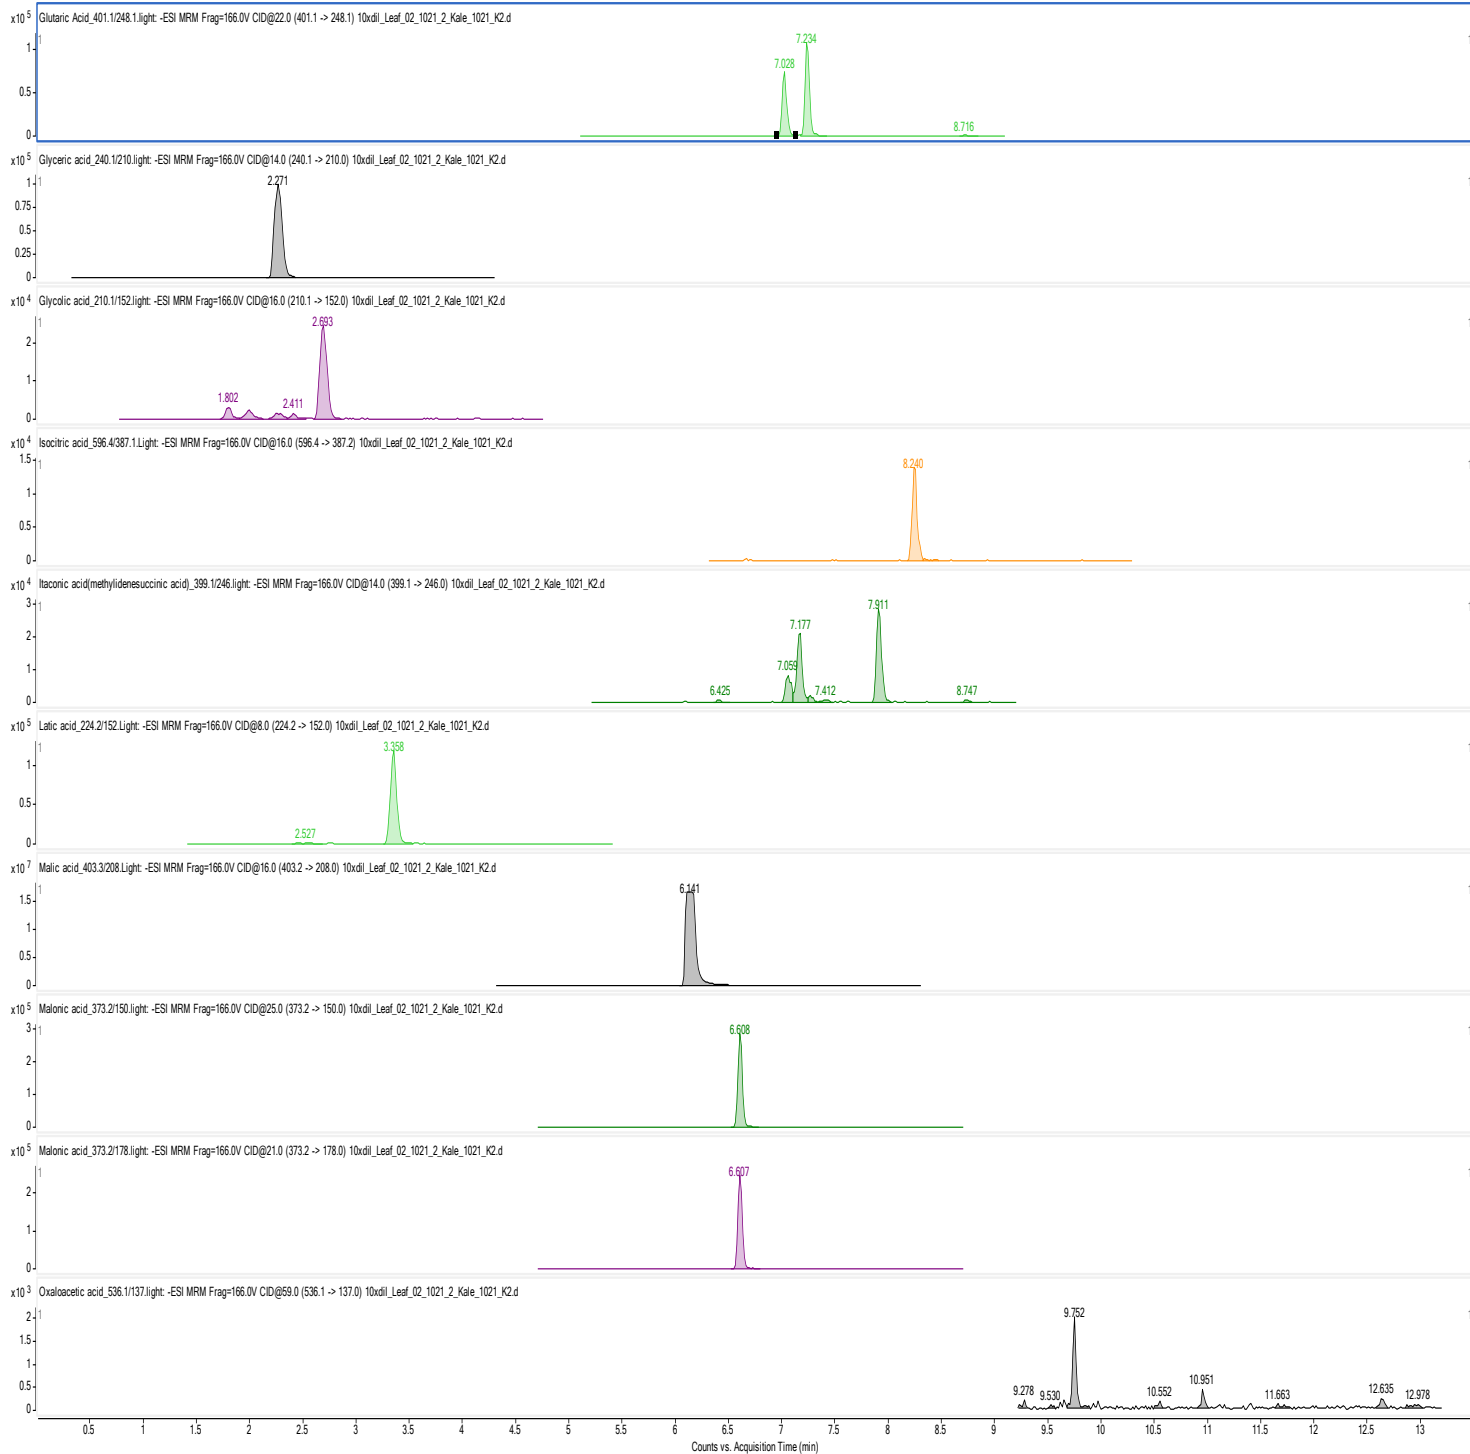

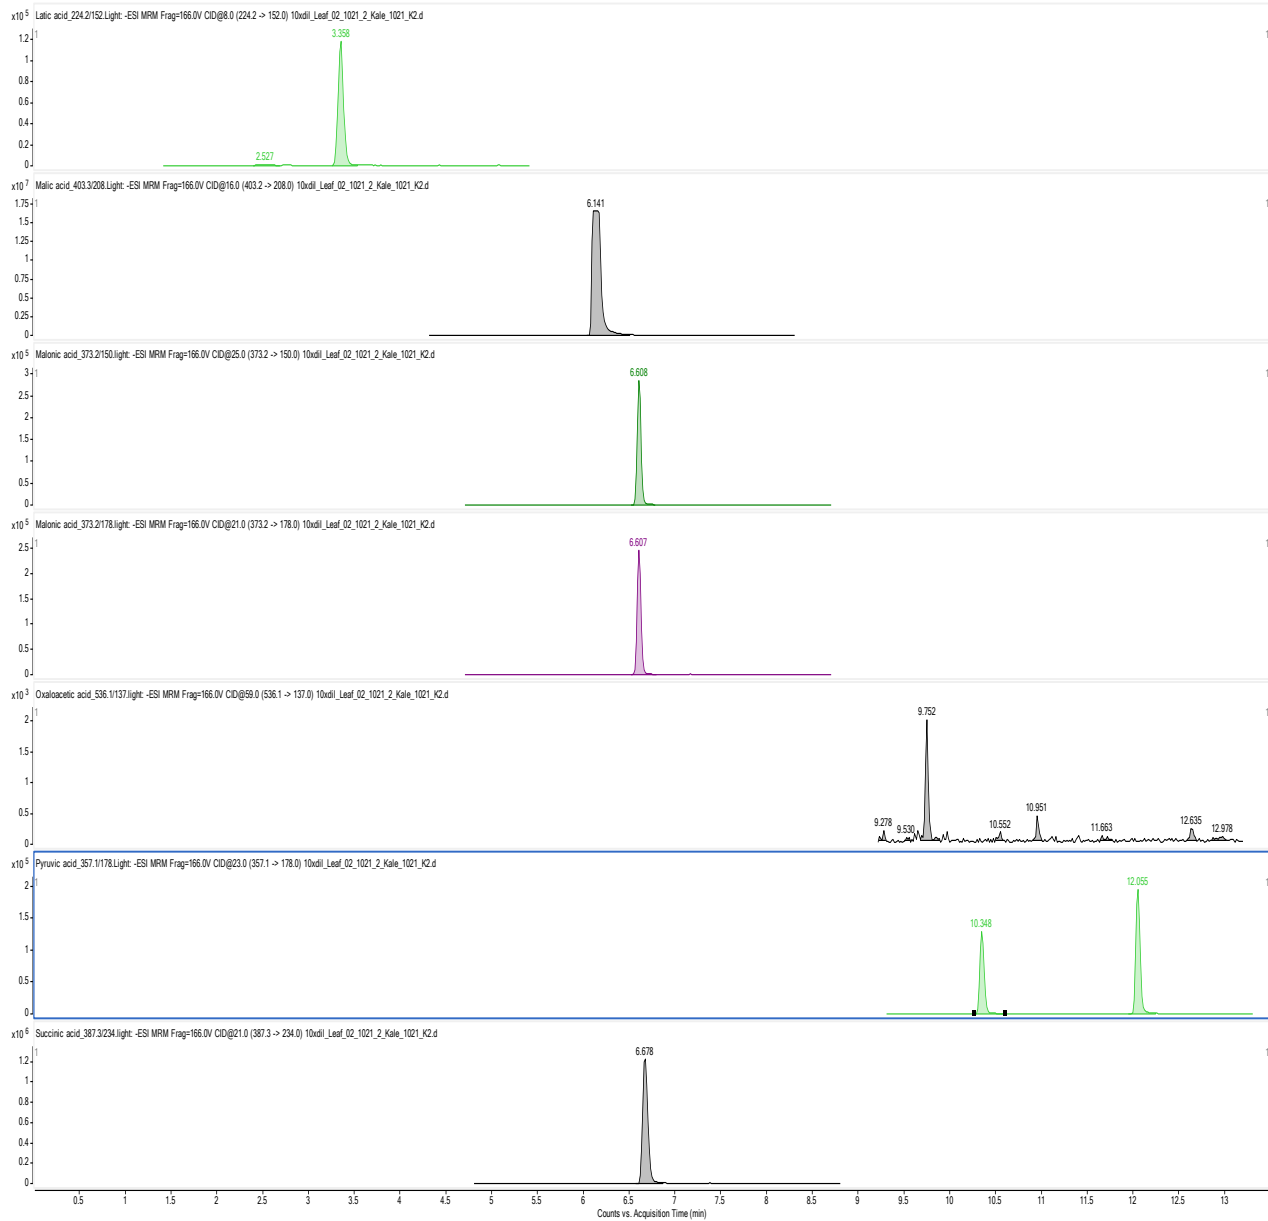

## 2. Sugars and selected sugar phosphates

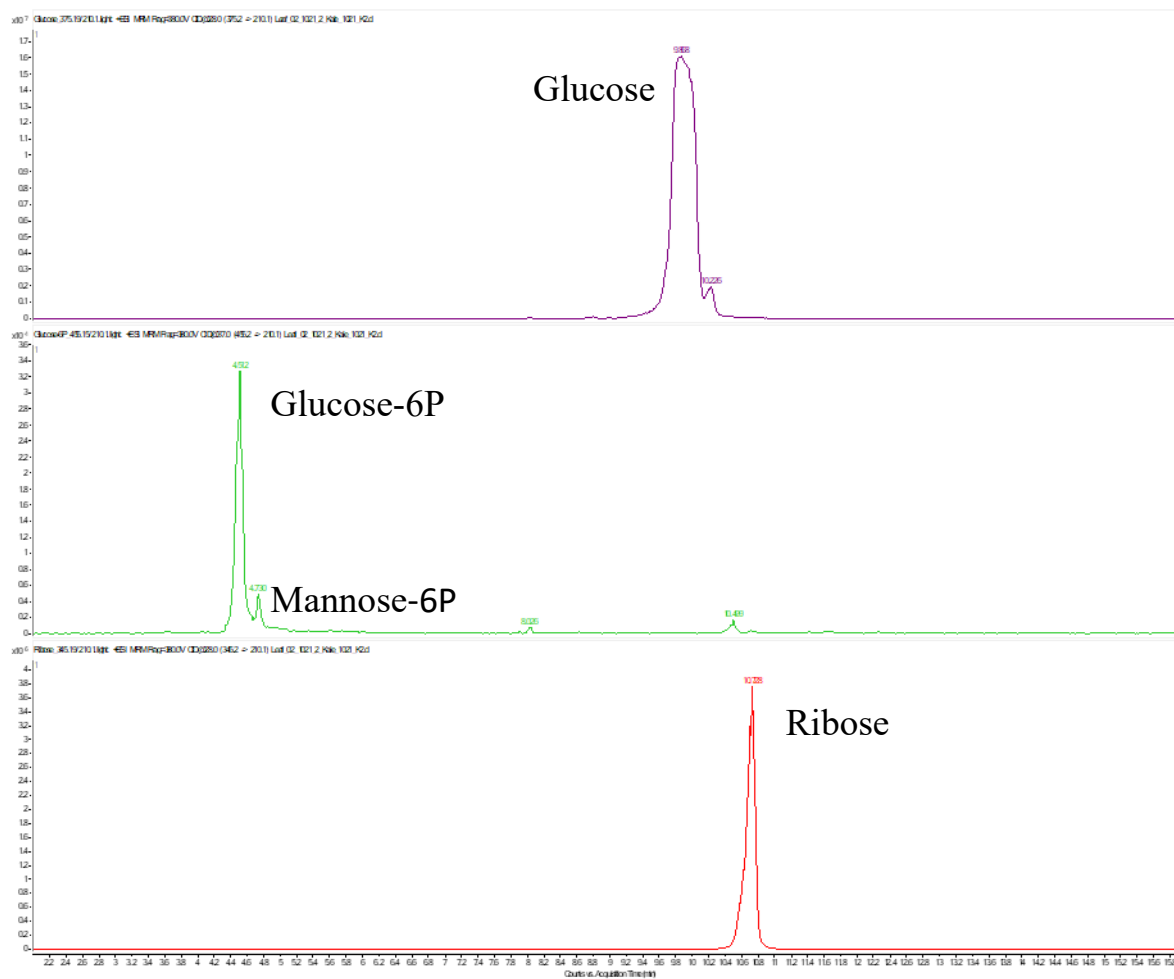

### 3. Phosphometabolites

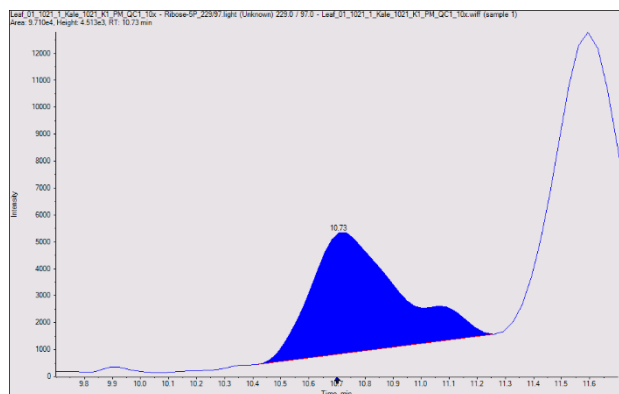

Ribulose-5P

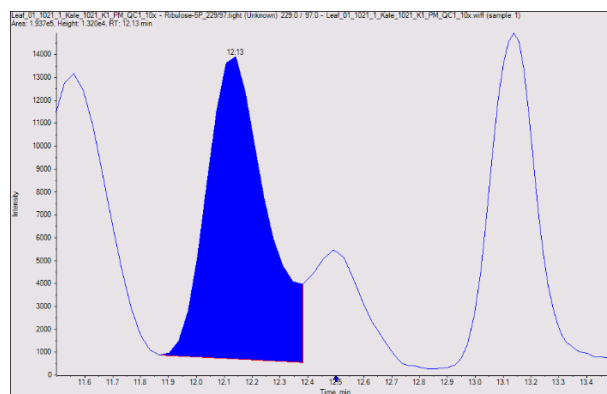

Ribulose-5P

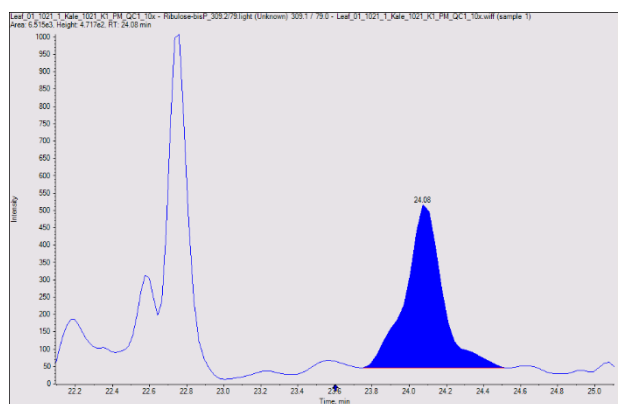

Ribulose-bisP

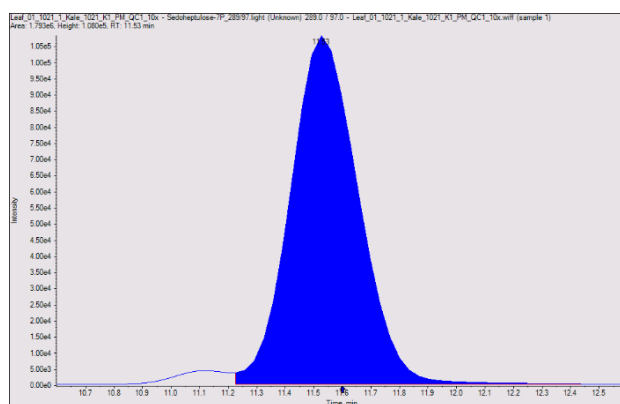

Sedoheptulose-7P

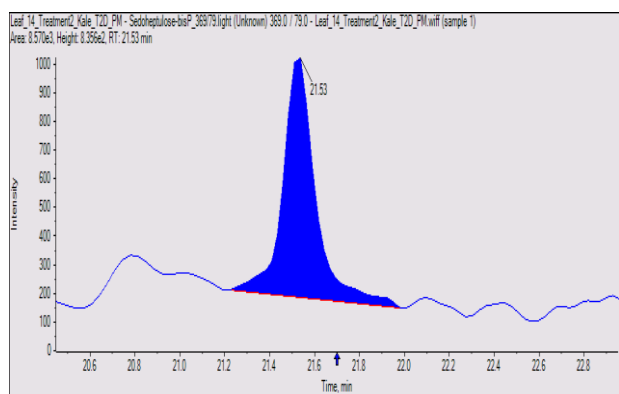

Sedoheptulose-1,7-bisP

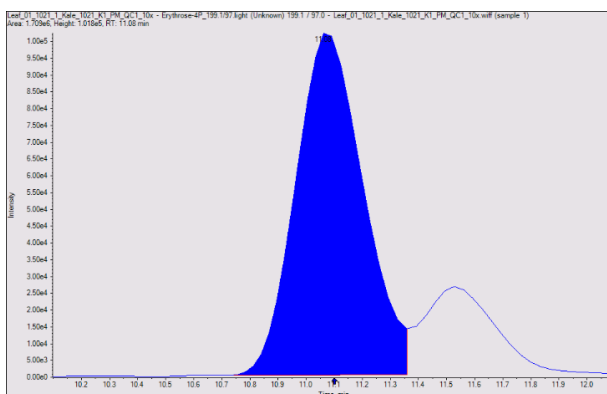

Erythrose-4P

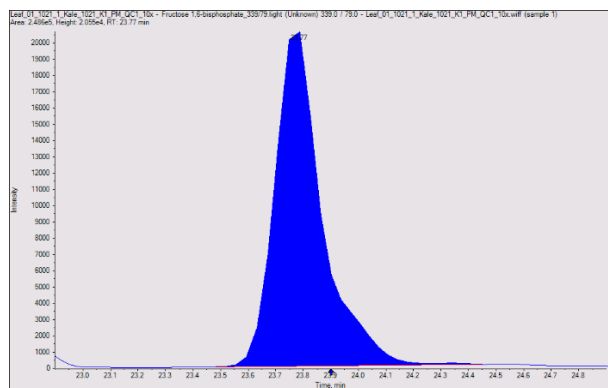

Fructose-1,6-bisP

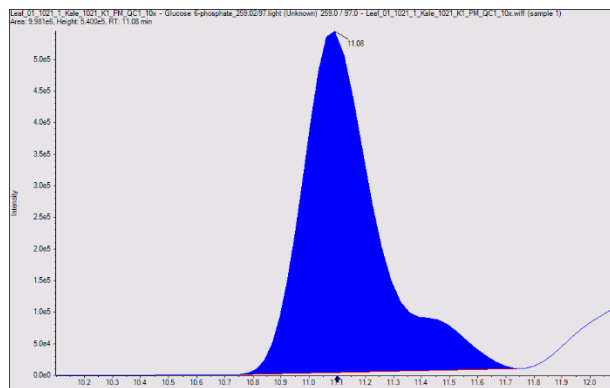

Fructose-6P

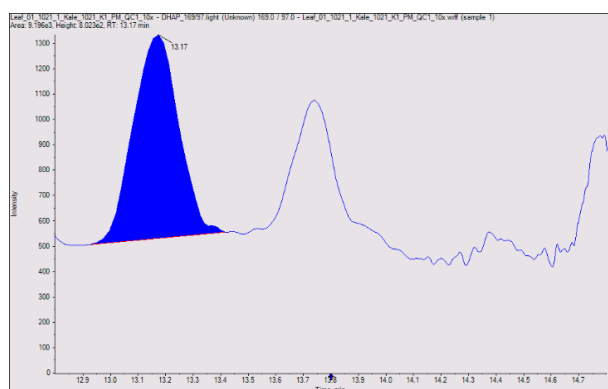

DHAP

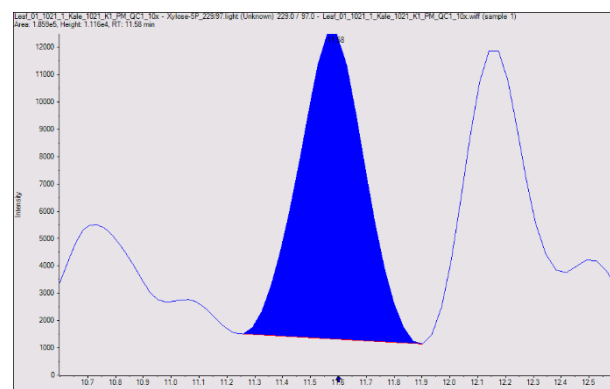

Xylose-5P

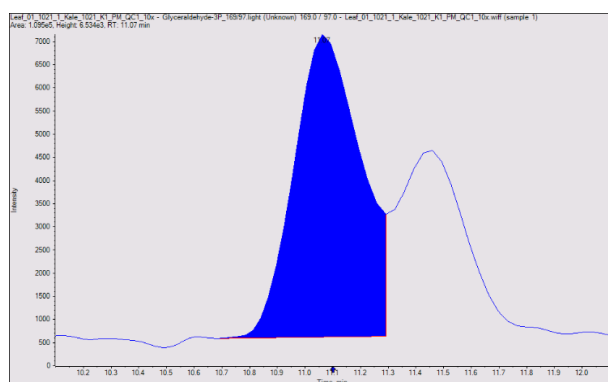

Glyceraldehyde-3P

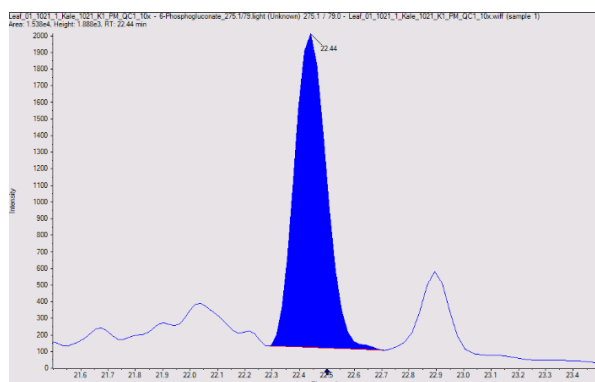

6-Phosphogluconate

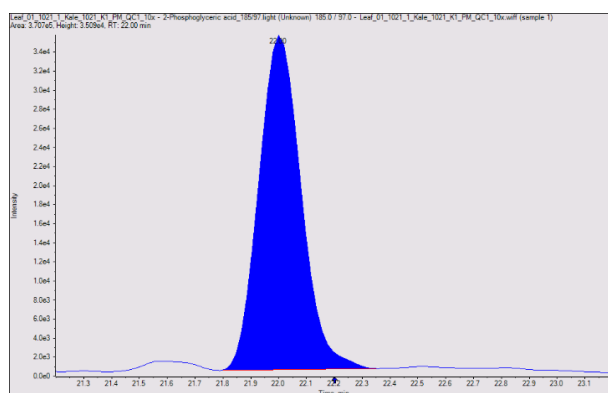

3-Phosphoglyceric acid

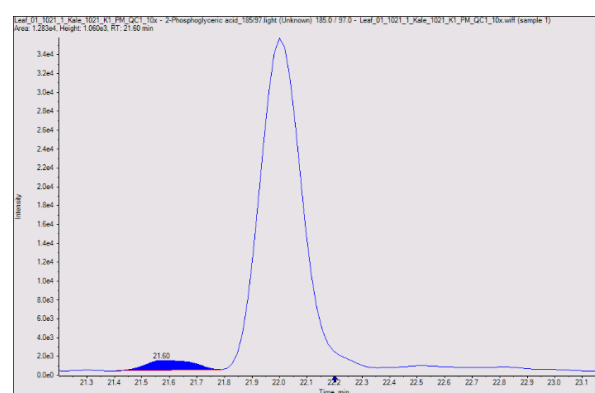

2-Phosphoglyceric acid

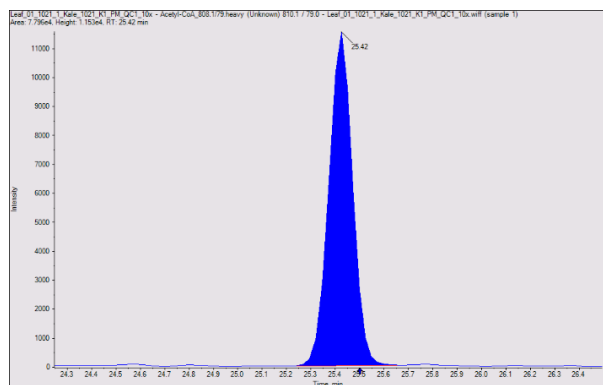

Acetyl-CoA

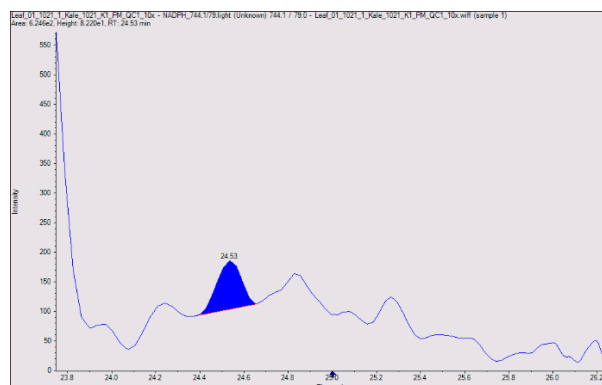

NADPH

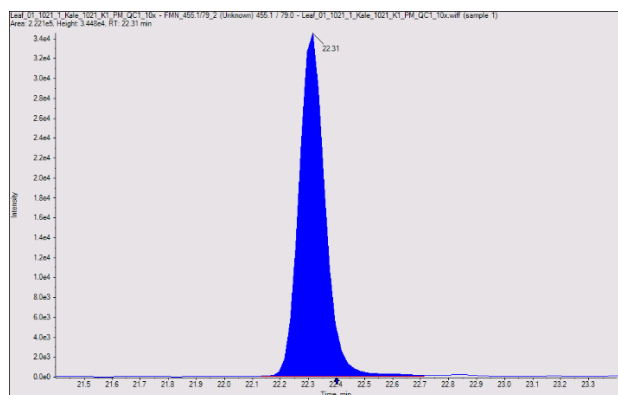

FMN

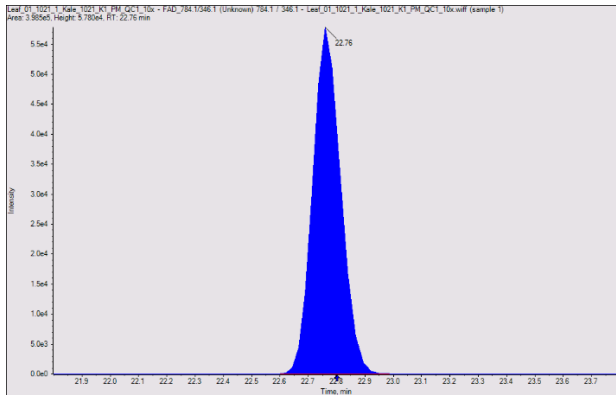

FAD

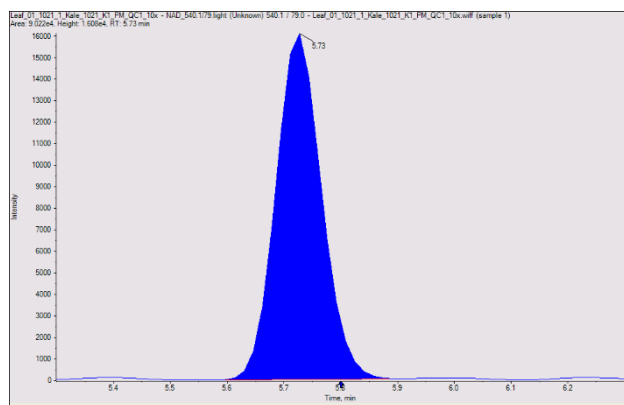

NAD

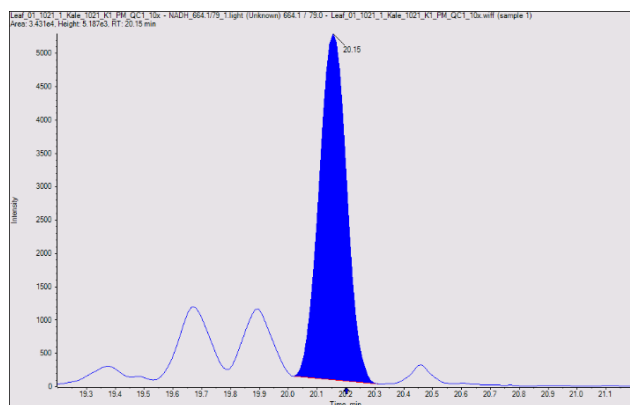

NADH

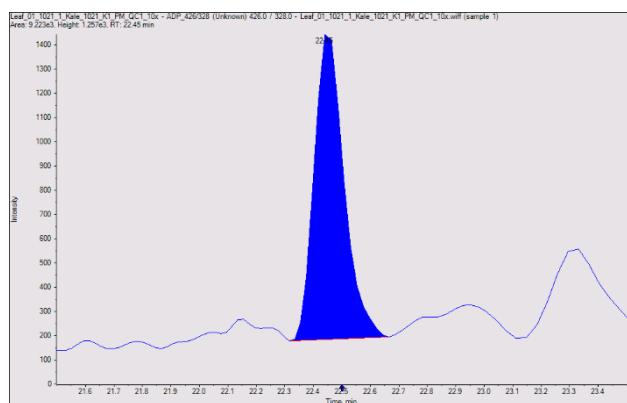

ADP

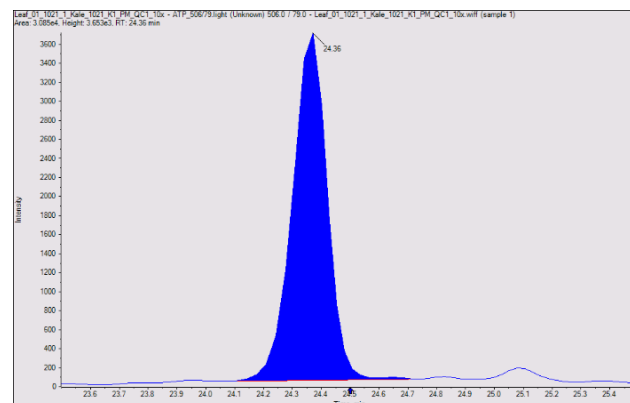

ATP

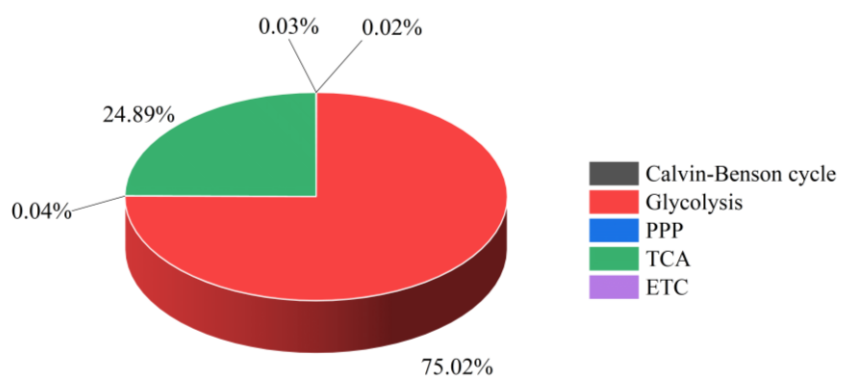

**Figure S2.** Classification of metabolites involved in CCM route (Calvin–Benson cycle, glycolysis, pentose phosphate pathway (PPP), tricarboxylic acid (TCA) cycle and electron transport chain (ETC)) in leaves of tomato ‘Scotia’ seedlings treated with pyroligneous acid (PA) under aluminum (Al) stress.
